## CORRECTION

# Correction: The association between vitamin D receptor polymorphism and phases of chronic hepatitis B infection in HBV carriers in Thailand

Prooksa Ananchuensook, Sirinporn Suksawatamnauy, Panarat Thaimai, Supachaya Sriphoosanaphan, Kessarinn Thanapirom, Chinachote Teerapakpinyo, Yong Poovorawan, Piyawat Komolmit

The seventh author's name is spelled incorrectly. The correct name is: Yong Poovorawan.

## Reference

1. Ananchuensook P, Suksawatamnauy S, Thaimai P, Sriphoosanaphan S, Thanapirom K, Teerapakpinyo C, et al. (2022) The association between vitamin D receptor polymorphism and phases of chronic hepatitis B infection in HBV carriers in Thailand. PLoS ONE 17(12): e0277907. <https://doi.org/10.1371/journal.pone.0277907> PMID: 36490235

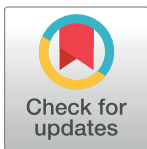

## OPEN ACCESS

**Citation:** Ananchuensook P, Suksawatamnauy S, Thaimai P, Sriphoosanaphan S, Thanapirom K, Teerapakpinyo C, et al. (2024) Correction: The association between vitamin D receptor polymorphism and phases of chronic hepatitis B infection in HBV carriers in Thailand. PLoS ONE 19(5): e0303545. <https://doi.org/10.1371/journal.pone.0303545>

**Published:** May 7, 2024

**Copyright:** © 2024 Ananchuensook et al. This is an open access article distributed under the terms of the [Creative Commons Attribution License](https://creativecommons.org/licenses/by/4.0/), which permits unrestricted use, distribution, and reproduction in any medium, provided the original author and source are credited.
